# Supplementary material for: Computational design of 2D functional covalent–organic framework membranes for water desalination
Source: Royal Society of Chemistry journal article supplement (doi:10.1039/c7ew00074j), 2017-01-01
Supplement: c7ew00074j1.pdf [file c7ew00074j1.pdf]

## Electronic supplementary information

### Computational design of 2D functional covalent–organic framework membranes for water desalination

Kang Zhang, Zhongjin He, Krishna M. Gupta and Jianwen Jiang\*

*Department of Chemical and Biomolecular Engineering, National University of Singapore, 117576, Singapore*

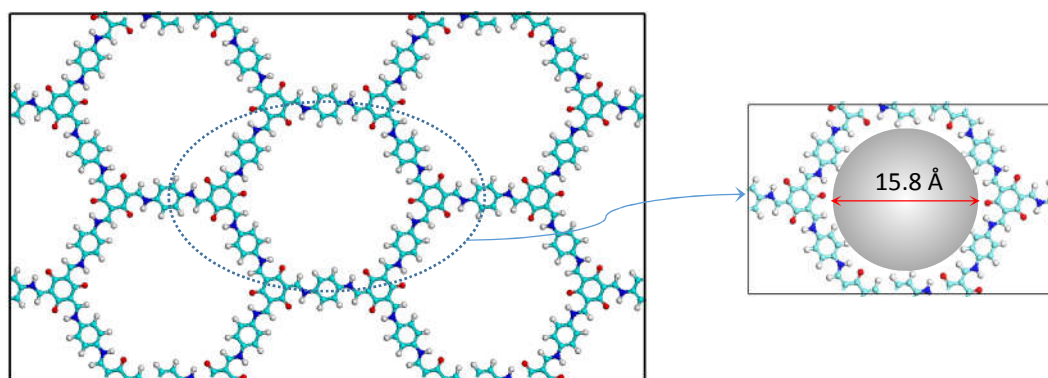

**Fig. S1** Atomic structure of TpPa-1.

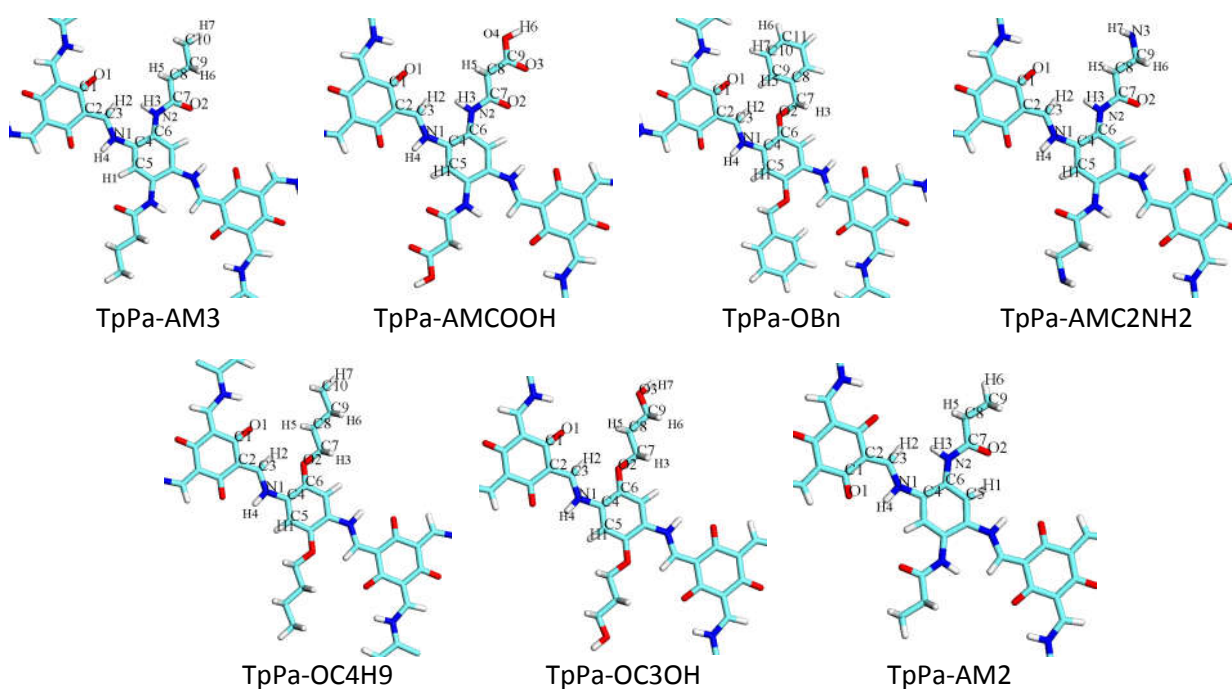

**Fig. S2** Functional groups and atomic notations in TpPa-X.

**Table S1** Force field parameters.

| Atom | $\sigma$ (Å) | $\epsilon/k_B$ (K) |
|------|--------------|--------------------|
| O    | 3.118        | 30.166             |
| N    | 3.261        | 34.691             |
| C    | 3.431        | 52.790             |
| H    | 2.571        | 22.122             |

**Table S2** Atomic charges by the DDEC method.

| TpPa-AM3 |                 | TpPa-AMCOOH |                 | TpPa-OBn |                 | TpPa-AMC2NH2 |                 |
|----------|-----------------|-------------|-----------------|----------|-----------------|--------------|-----------------|
| Atom     | Charges ( $e$ ) | Atom        | Charges ( $e$ ) | Atom     | Charges ( $e$ ) | Atom         | Charges ( $e$ ) |
| H1       | 0.159           | H1          | 0.159           | H1       | 0.131           | H1           | 0.159           |
| H2       | 0.090           | H2          | 0.089           | H2       | 0.107           | H2           | 0.089           |
| H3       | 0.283           | H3          | 0.282           | H3       | 0.056           | H3           | 0.285           |
| H4       | 0.307           | H4          | 0.307           | H4       | 0.290           | H4           | 0.306           |
| H5       | 0.107           | H5          | 0.158           | H5       | 0.102           | H5           | 0.108           |
| H6       | 0.069           | H6          | 0.392           | H6       | 0.072           | H6           | 0.076           |
| H7       | 0.096           | C1          | 0.454           | H7       | 0.086           | H7           | 0.269           |
| C1       | 0.455           | C2          | -0.295          | C1       | 0.451           | C1           | 0.454           |
| C2       | -0.295          | C3          | 0.127           | C2       | -0.303          | C2           | -0.294          |
| C3       | 0.127           | C4          | 0.113           | C3       | 0.149           | C3           | 0.127           |
| C4       | 0.113           | C5          | -0.245          | C4       | 0.144           | C4           | 0.113           |
| C5       | -0.247          | C6          | 0.187           | C5       | -0.310          | C5           | -0.247          |
| C6       | 0.185           | C7          | 0.613           | C6       | 0.191           | C6           | 0.184           |
| C7       | 0.593           | C8          | -0.469          | C7       | 0.074           | C7           | 0.608           |
| C8       | -0.320          | C9          | 0.709           | C8       | 0.039           | C8           | -0.378          |
| C9       | -0.027          | N1          | -0.301          | C9       | -0.127          | C9           | 0.108           |
| C10      | -0.315          | N2          | -0.466          | C10      | -0.070          | N1           | -0.301          |
| N1       | -0.302          | O1          | -0.491          | C11      | -0.107          | N2           | -0.454          |
| N2       | -0.452          | O2          | -0.444          | N1       | -0.303          | N3           | -0.665          |
| O1       | -0.495          | O3          | -0.485          | O1       | -0.475          | O1           | -0.495          |
| O2       | -0.498          | O4          | -0.552          | O2       | -0.246          | O2           | -0.506          |

| TpPa-OC4H9 |                 | TpPa-OC3OH |                 | TpPa-AM2 |                 |
|------------|-----------------|------------|-----------------|----------|-----------------|
| Atom       | Charges ( $e$ ) | Atom       | Charges ( $e$ ) | Atom     | Charges ( $e$ ) |
| H1         | 0.134           | H1         | 0.139           | H1       | 0.159           |
| H2         | 0.110           | H2         | 0.110           | H2       | 0.089           |
| H3         | 0.042           | H3         | 0.046           | H3       | 0.284           |
| H4         | 0.299           | H4         | 0.301           | H4       | 0.306           |
| H5         | 0.097           | H5         | 0.114           | H5       | 0.099           |
| H6         | 0.052           | H6         | 0.015           | H6       | 0.100           |
| H7         | 0.089           | H7         | 0.346           | C1       | 0.454           |
| C1         | 0.472           | C1         | 0.470           | C2       | -0.294          |
| C2         | -0.309          | C2         | -0.307          | C3       | 0.128           |
| C3         | 0.144           | C3         | 0.143           | C4       | 0.113           |
| C4         | 0.148           | C4         | 0.149           | C5       | -0.245          |
| C5         | -0.320          | C5         | -0.320          | C6       | 0.184           |

|     |        |    |        |    |        |
|-----|--------|----|--------|----|--------|
| C6  | 0.193  | C6 | 0.192  | C7 | 0.583  |
| C7  | 0.090  | C7 | 0.093  | C8 | -0.247 |
| C8  | -0.192 | C8 | -0.214 | C9 | -0.268 |
| C9  | -0.048 | C9 | 0.144  | N1 | -0.301 |
| C10 | -0.303 | N1 | -0.307 | N2 | -0.455 |
| N1  | -0.307 | O1 | -0.511 | O1 | -0.495 |
| O1  | -0.515 | O2 | -0.248 | O2 | -0.493 |
| O2  | -0.246 | O3 | -0.531 |    |        |

**Table S3** Atomic charges by the EQeq method.

| TpPa-OC3OH |                      | TpPa-AM2 |                      |
|------------|----------------------|----------|----------------------|
| Atom       | Charges ( <i>e</i> ) | Atom     | Charges ( <i>e</i> ) |
| H1         | 0.066                | H1       | 0.090                |
| H2         | 0.053                | H2       | 0.031                |
| H3         | 0.020                | H3       | 0.095                |
| H4         | 0.112                | H4       | 0.116                |
| H5         | 0.087                | H5       | 0.063                |
| H6         | 0.009                | H6       | 0.045                |
| H7         | 0.135                | C1       | 0.208                |
| C1         | 0.212                | C2       | -0.124               |
| C2         | -0.128               | C3       | 0.081                |
| C3         | 0.086                | C4       | 0.053                |
| C4         | 0.054                | C5       | -0.086               |
| C5         | -0.100               | C6       | 0.075                |
| C6         | 0.108                | C7       | 0.231                |
| C7         | 0.070                | C8       | -0.139               |
| C8         | -0.143               | C9       | -0.100               |
| C9         | 0.092                | N1       | -0.156               |
| N1         | -0.152               | N2       | -0.187               |
| O1         | -0.223               | O1       | -0.222               |
| O2         | -0.205               | O2       | -0.226               |
| O3         | -0.271               |          |                      |

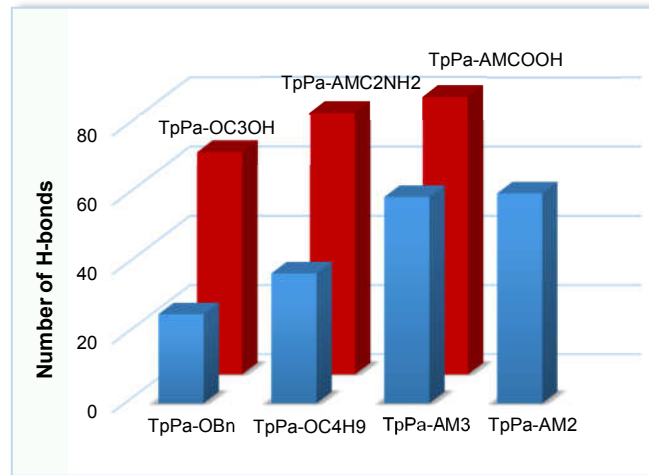

**Fig. S3** Numbers of hydrogen bonds formed between TpPa-X membranes and water.

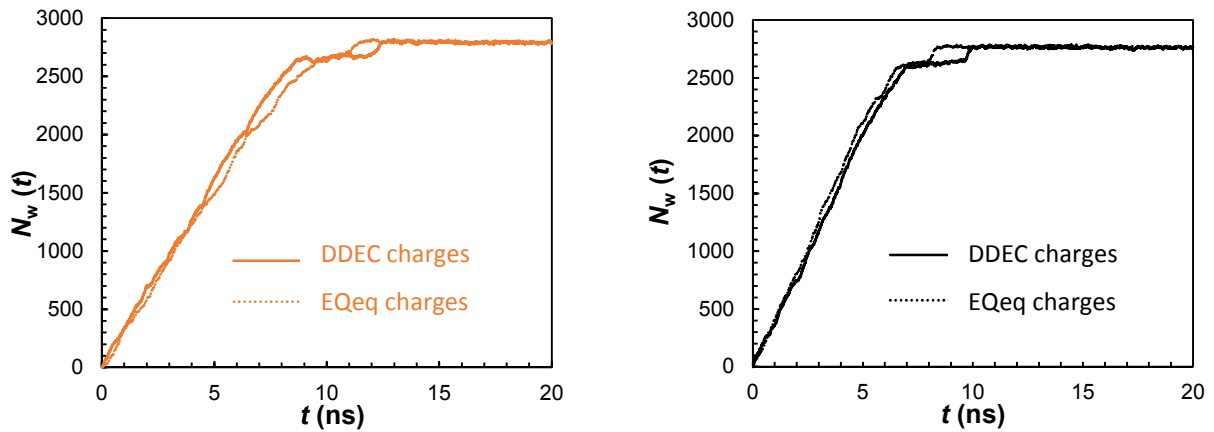

**Fig. S4** Net water flow through TpPa-OC3OH and -AM2 membranes with different atomic charges.

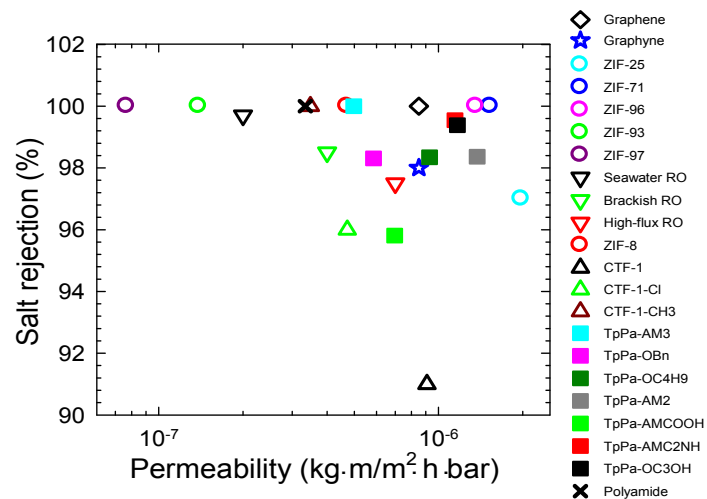

**Fig. S5** Performance (salt rejection versus permeability) of TpPa-X and other membranes.

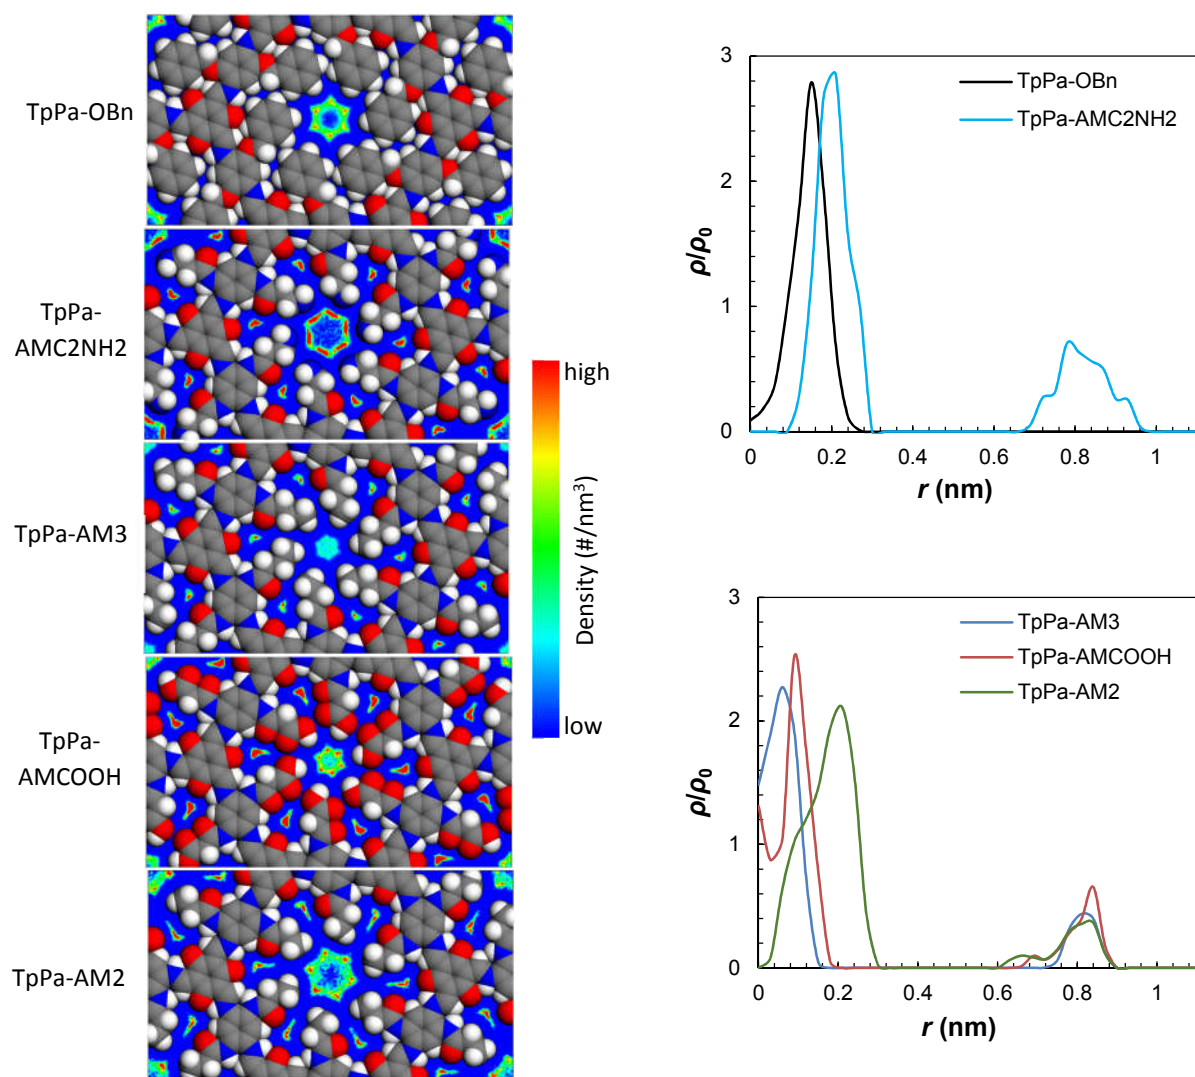

**Fig. S6** (Left) Density contours of water molecules at membrane apertures. (Right) Density profiles along radial direction.

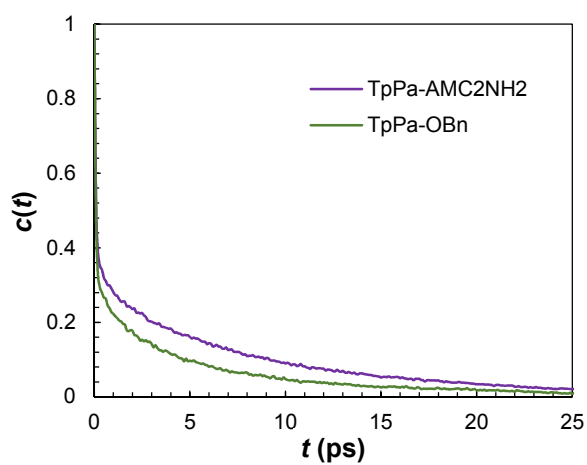

**Fig. S7** Autocorrelation functions  $c(t)$  in TpPa-AMC2NH2 and -OBn membranes.
